# Supplementary material
Source: PubMed Central journal article supplement (PMC7088889)
Supplement: pt9b00095_si_001.pdf [file pt9b00095_si_001.pdf]

## Supporting information

### **Serelaxin and the AT<sub>2</sub> receptor agonist, CGP42112 evoked similar, non-additive, cardiac anti-fibrotic effect in high salt-fed mice that were refractory to candesartan cilexetil**

Yan Wang<sup>1,2\*</sup>, Lei Han<sup>1,2</sup>, Matthew Shen<sup>1,2</sup>, Emma S. Jones<sup>1,2</sup>, Iresha Spizzo<sup>1,2</sup>, Sarah L Walton<sup>1,3</sup>, Kate M Denton<sup>1,3</sup>, Tracey A. Gaspari<sup>1,2</sup>, Chrisan S. Samuel<sup>1,2</sup>, Robert E. Widdop<sup>1,2</sup>

<sup>1</sup>Cardiovascular Disease Program, Biomedicine Discovery Institute and Departments of <sup>2</sup>Pharmacology and <sup>3</sup>Physiology, Monash University, Clayton, Victoria, 3800 Australia

\* Author for correspondence

#### **Table of contents (4 pages total)**

|                                                                        |     |
|------------------------------------------------------------------------|-----|
| Figure S-1 depicts fuller blot of that shown in Fig 3A, 4A and 4C..... | S-2 |
| Figure S-2. All western blots for data in Figure 3B.....               | S-3 |
| Table S-1. Animal body weight data.....                                | S-4 |

Figure S-1 depicts fuller blot of that shown in Fig 3A, 4A and 4C

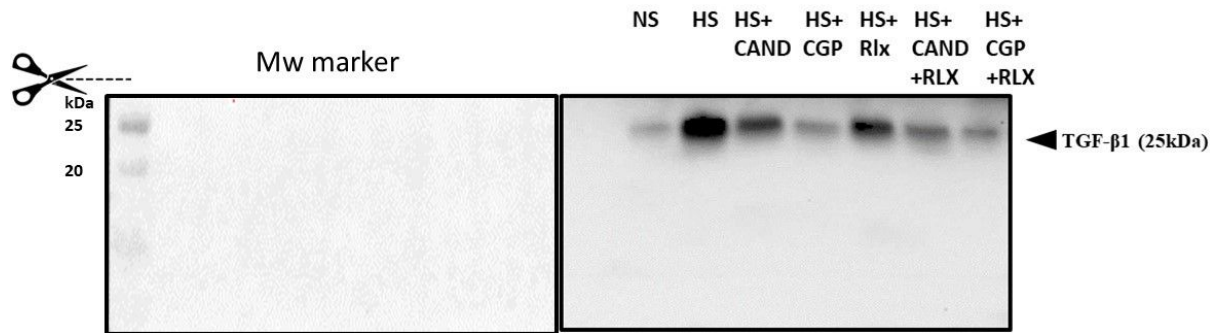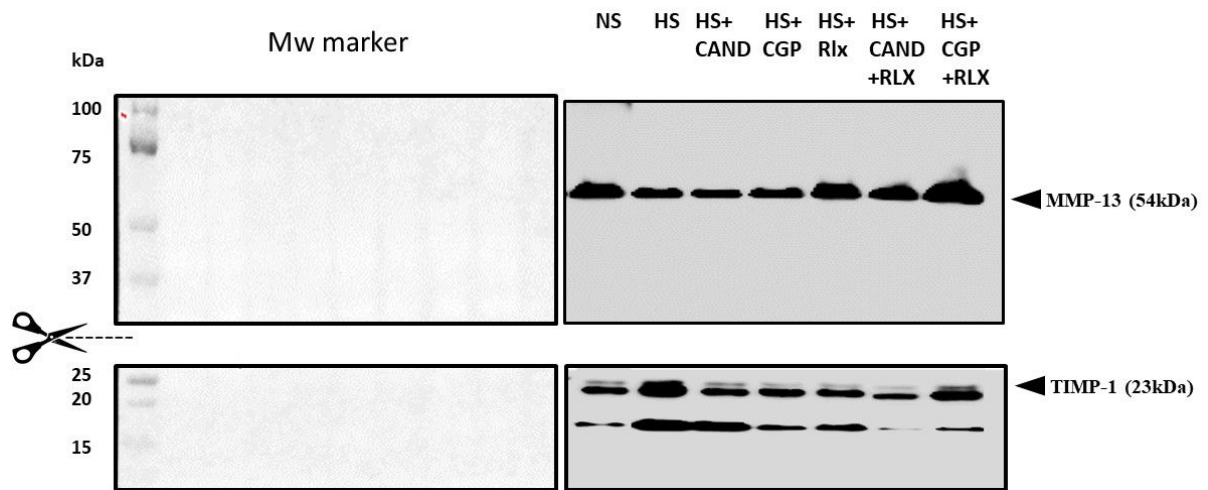

Figure S-2. Additional western blots for all data in Figure 3B

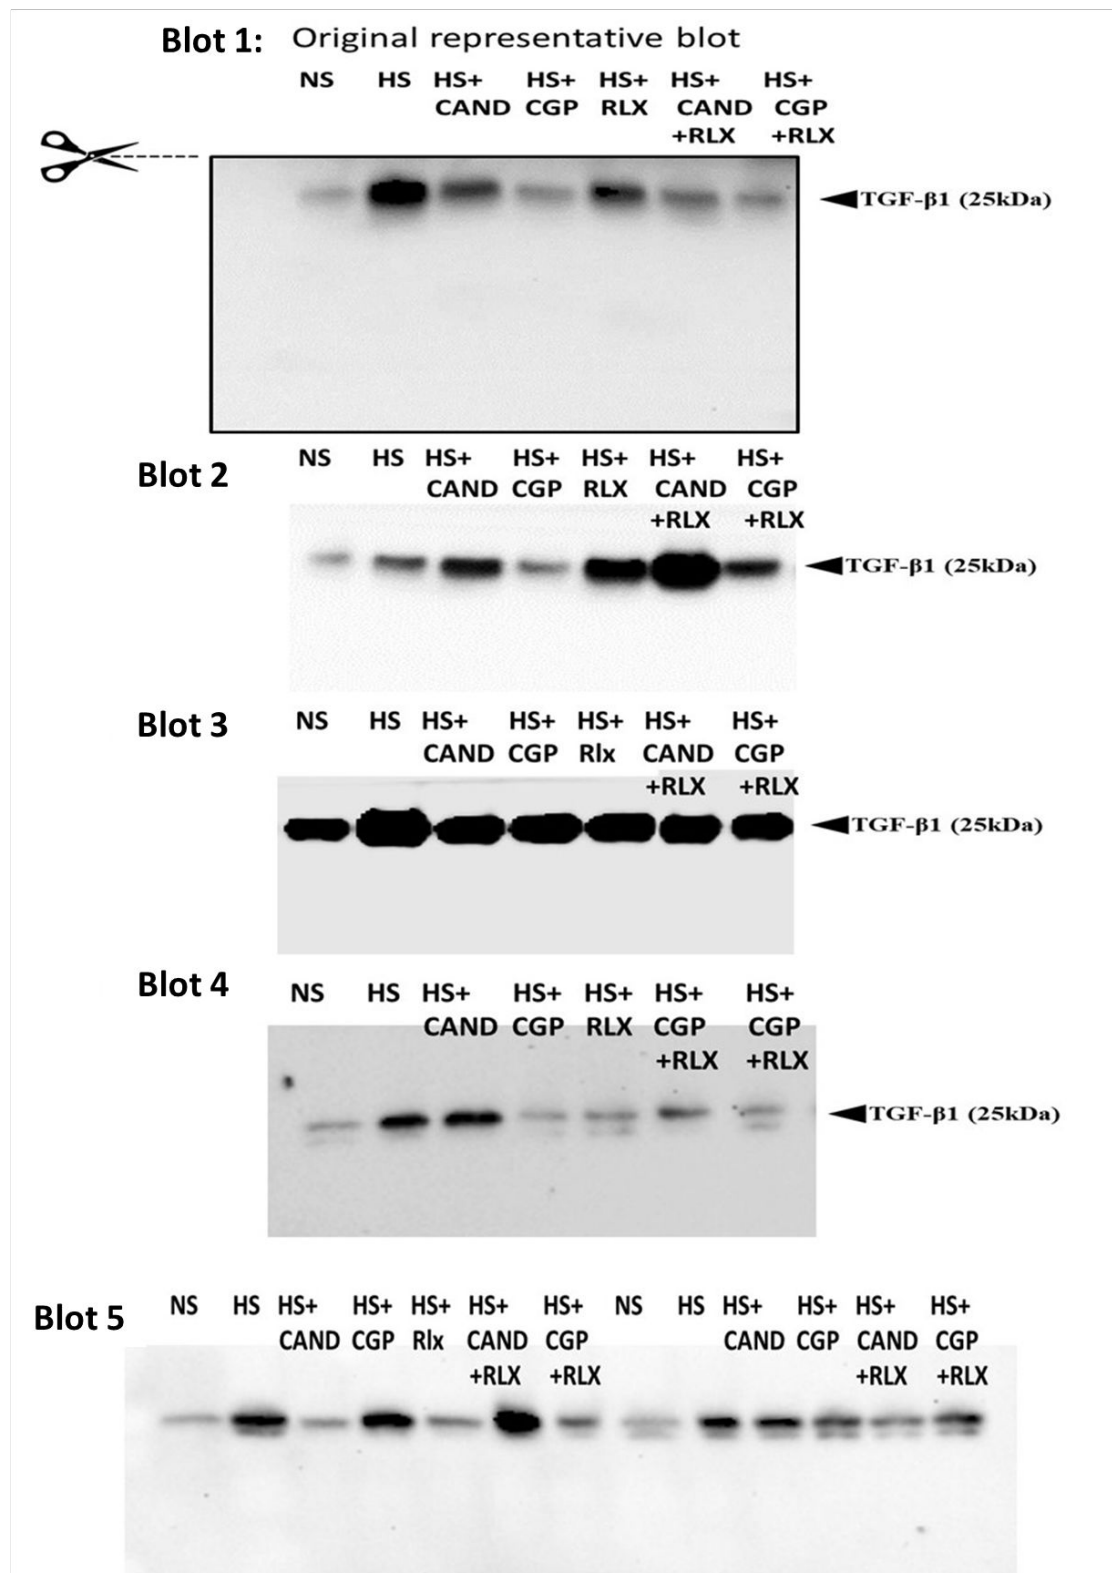

**Table S-1. Body weights over 8-week period of HS diet ± drug treatments**

|                    | <b>Week 0 (g)</b> | <b>Week 4 (g)</b> | <b>Week 8 (g)</b> |
|--------------------|-------------------|-------------------|-------------------|
| <b>NS</b>          | 30.2±0.7          | 32.3±0.8          | 32.1±1.0          |
| <b>HS</b>          | 27.7±0.8          | 29.4±1.1          | 29.2±1.0          |
| <b>HS+CAND</b>     | 27.9±0.5          | 28.7±0.8          | 29.7±0.7          |
| <b>HS+CGP</b>      | 27.9±0.6          | 30.0±0.6          | 31.5±0.7          |
| <b>HS+RLX</b>      | 30.4±1.2          | 33.8±1.5          | 35.3±1.2          |
| <b>HS+CAND+RLX</b> | 31.6±1.2          | 34.5±1.4          | 35.2±0.7          |
| <b>HS+CGP+RLX</b>  | 29.6±1.1          | 31.9±1.2          | 34.8±0.9          |
